# Supplementary material for: Bright mechanoluminescent luminogens even in daylight through close intermolecular interaction with the characteristic of hybridized local and charge transfer (HLCT)
Source: Royal Society of Chemistry journal article supplement (doi:10.1039/d0tc01095b), 2020-01-01
Supplement: d0tc01095b1.pdf [file d0tc01095b1.pdf]

## Electronic Supplementary Information (ESI)

### Bright mechanoluminescent luminogen even in daylight through close intermolecular interaction with the characteristic of hybridized local and charge transfer (HLCT)

Dan Li,<sup>a,d</sup> Jie Yang,<sup>a\*</sup> Yunsheng Wang,<sup>a</sup> Xiaoning Li,<sup>a</sup> Dongxia Zhu,<sup>d\*</sup> Manman Fang,<sup>a</sup> Zhen Li<sup>a,b,c,\*</sup>

#### Table of Contents

**Figure S1.** The <sup>1</sup>H NMR spectrum of FCO-TPA.

**Figure S2.** The <sup>13</sup>C NMR spectrum of FCO-TPA.

**Figure S3.** The <sup>1</sup>H NMR spectrum of FCO-CzS.

**Figure S4.** The <sup>13</sup>C NMR spectrum of FCO-CzS.

**Figure S5.** The <sup>1</sup>H NMR spectrum of FCO-CzO.

**Figure S6.** The <sup>13</sup>C NMR spectrum of FCO-CzO.

**Figure S7.** The high resolution mass spectrum of FCO-TPA.

**Figure S8.** The high resolution mass spectrum of FCO-CzS.

**Figure S9.** The high resolution mass spectrum of FCO-CzO.

**Figure S10.** The UV-visible spectra of FCO-TPA, FCO-CzS and FCO-CzO in THF solution.

**Figure S11.** The emission spectra of FCO-TPA, FCO-CzS and FCO-CzO in THF solution.

**Figure S12.** The UV-visible spectra of (a) FCO-CzS and (b) FCO-CzO in different solvents.

**Figure S13.** PL spectra of FCO-CzS and FCO-CzO in different solvents.

**Table S1.** Detailed absorption and emission peak positions of FCO-TPA, FCO-CzS and FCO-CzO in different solvents.

**Figure S14.** The emission spectra of FCO-TPA, FCO-CzS and FCO-CzO in solid state.

**Figure S15.** Emission decay curves of FCO-TPA, FCO-CzS and FCO-CzO in solid state.

**Figure S16.**  $S_0 \rightarrow S_1$  natural transition orbital (NTO) for FCO-CzS and FCO-CzO.

**Figure S17.** The simple model for exciton relaxation process and calculated singlet–triplet energy of FCO-CzS.

**Figure S18.** The simple model for exciton relaxation process and calculated singlet–triplet energy of FCO-CzO.

**Figure S19.** The (a) PXRD and (b)  $^1\text{H}$  NMR of FCO-TPA before and after scratching.

**Figure S20.** The D-A twist angles of (a) FCO-TPA ( $45.95^\circ$ ), (b) FCO-CzS ( $50.37^\circ$ ) and (c) FCO-CzO ( $47.26^\circ$ ).

**Figure S21.** The HOMO/LUMO orbital distributions and dipole moments of the isolated molecules for FCO-TPA, FCO-CzS and FCO-CzO.

**Figure S22.** The DSC data of FCO-TPA, FCO-CzS and FCO-CzO.

**Table S2.** X-ray crystallographic data of FCO-TPA.

**Table S3.** X-ray crystallographic data of FCO-CzS.

**Table S4.** X-ray crystallographic data of FCO-CzO.

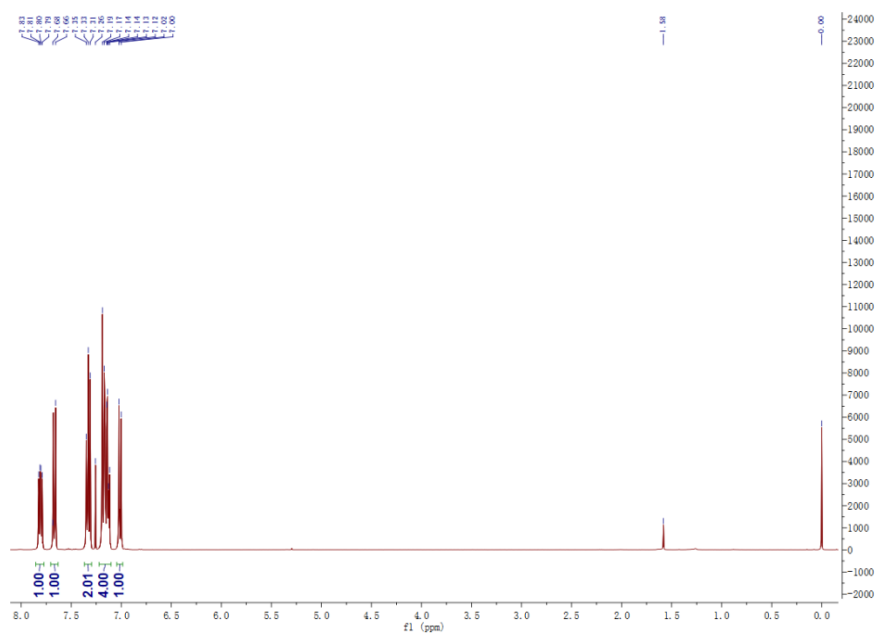

**Figure S1.** The  $^1\text{H}$  NMR spectrum of FCO-TPA.

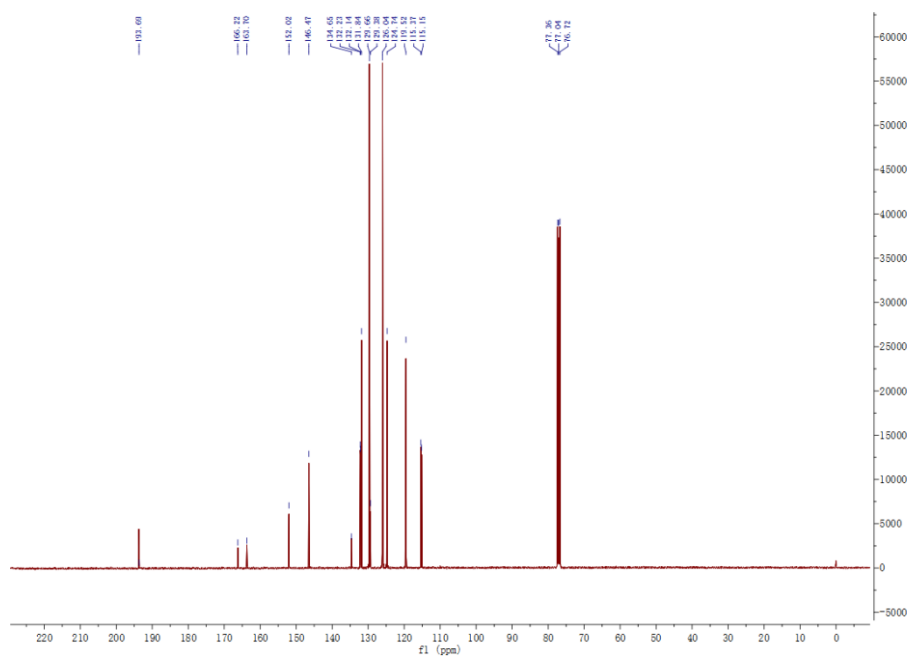

**Figure S2.** The  $^{13}\text{C}$  NMR spectrum of FCO-TPA.

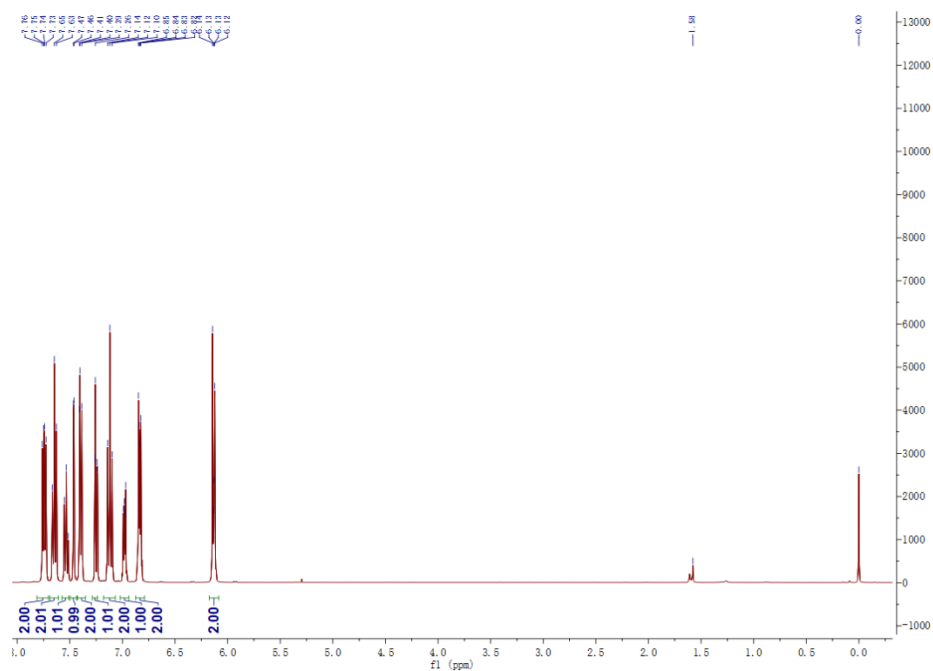

**Figure S3.** The  $^1\text{H}$  NMR spectrum of FCO-CzS.

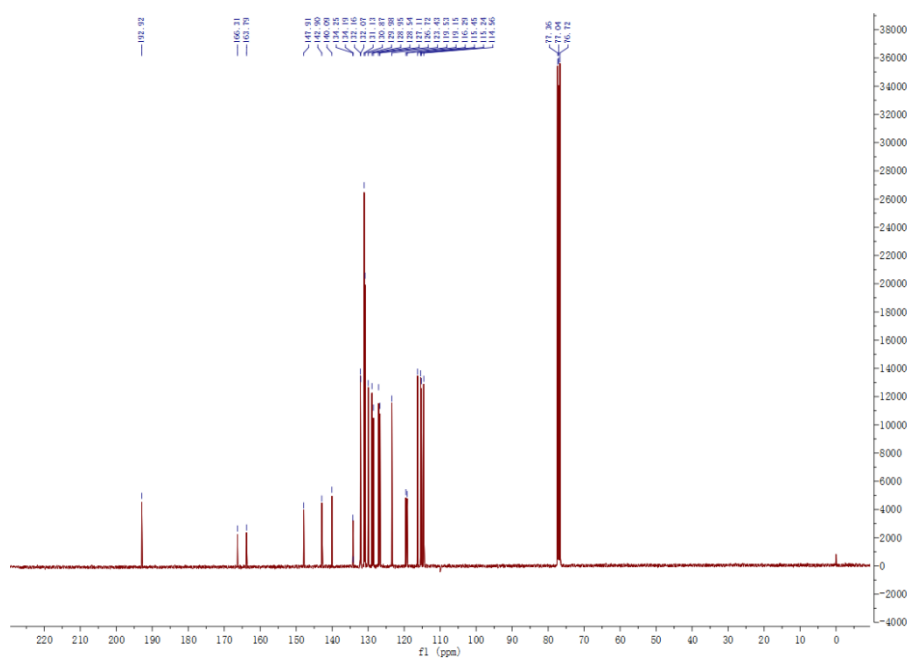

**Figure S4.** The  $^{13}\text{C}$  NMR spectrum of FCO- CzS.

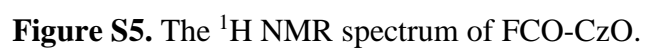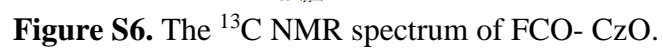

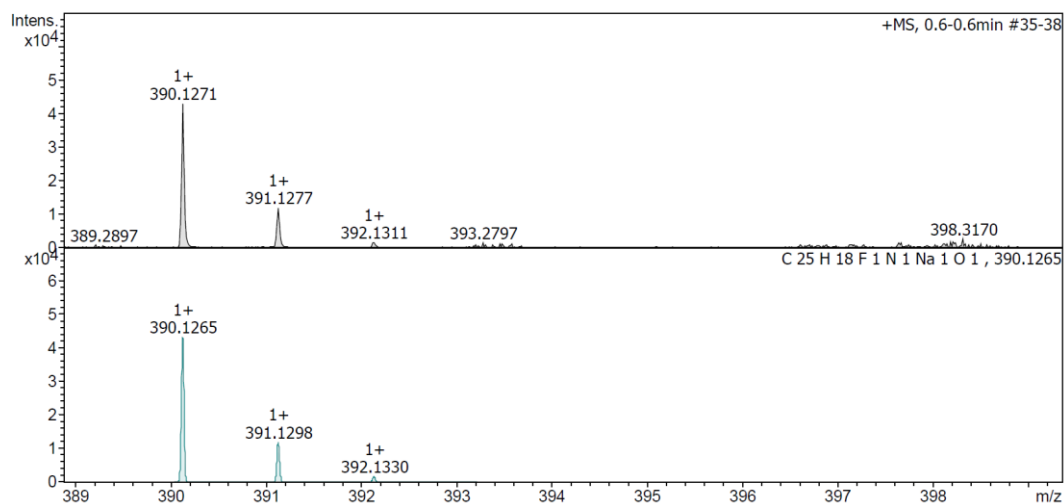

**Figure S7.** The high resolution mass spectrum of FCO-TPA.

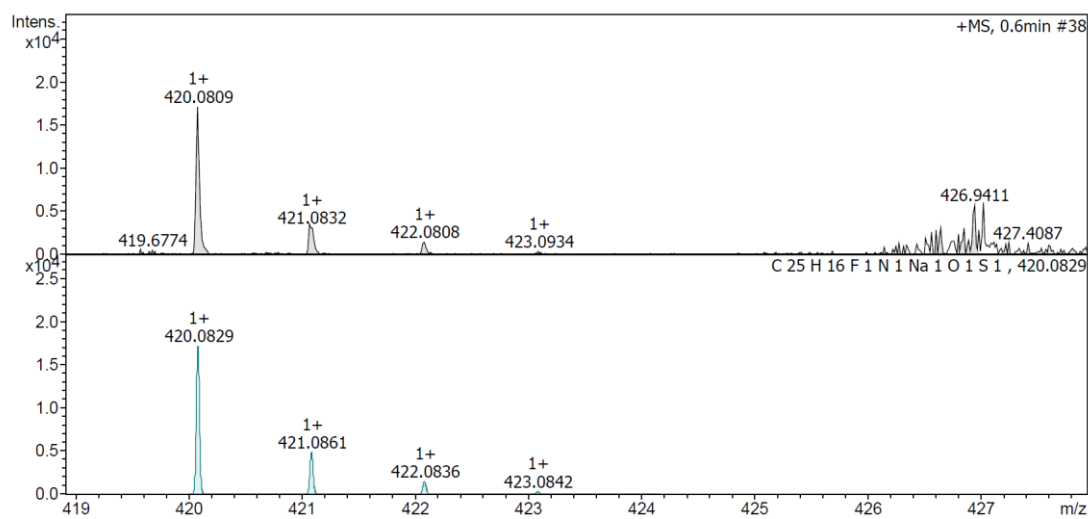

**Figure S8.** The high resolution mass spectrum of FCO-CzS.

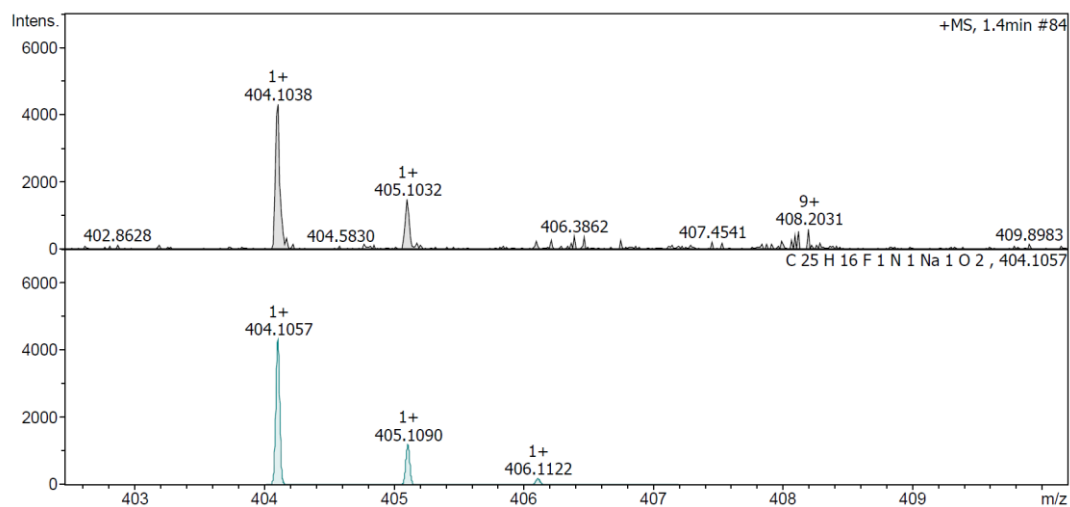

**Figure S9.** The high resolution mass spectrum of FCO-CzO.

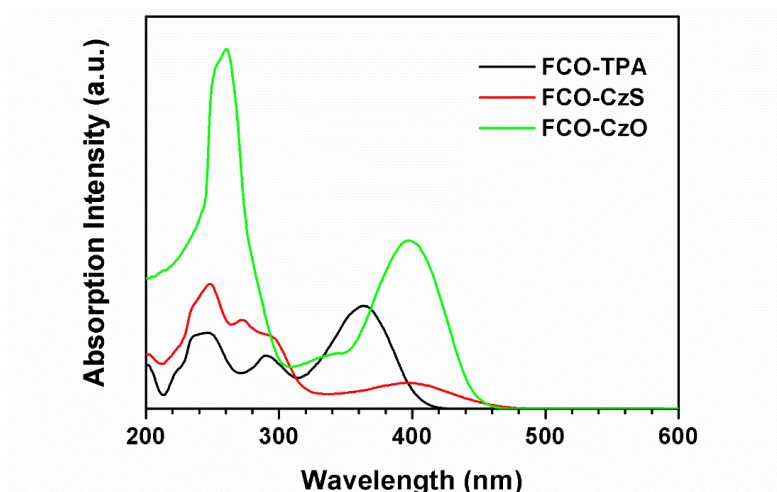

**Figure S10.** The UV-visible spectra of FCO-TPA, FCO-CzS and FCO-CzO in THF solution.

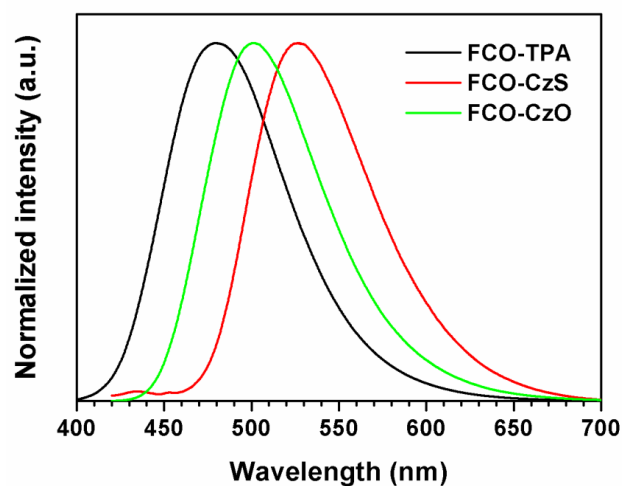

**Figure S11.** The emission spectra of FCO-TPA, FCO-CzS and FCO-CzO in THF solution.

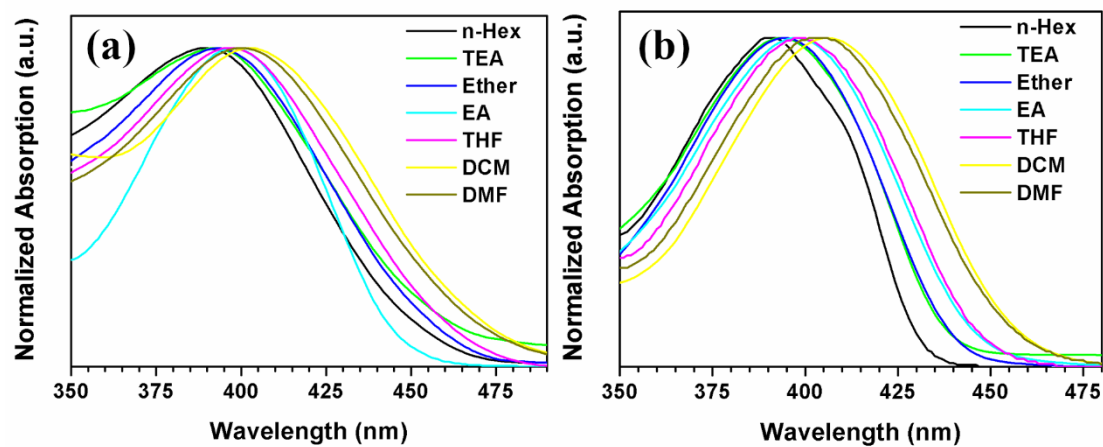

**Figure S12.** The UV-visible spectra of (a) FCO-CzS and (b) FCO-CzO in different solvents.

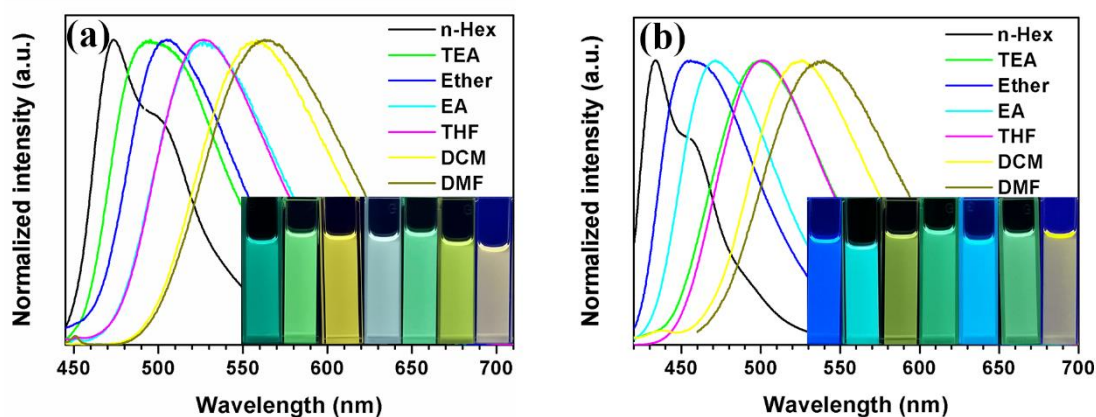

**Figure S13.** PL spectra of FCO-CzS and FCO-CzO in different solvents.

### Solvatochromic effect

The influence of solvent environment on the optical property of our compounds can be understood using the Lippert-Mataga equation:

$$hc(v_a - v_f) = hc(v_a^0 - v_f^0) + \frac{2\Delta\mu^2}{a^3} f(\epsilon, n).$$

where  $a = \sqrt[3]{\frac{3M}{4\pi d N_a}}$

In the above equations,  $v_a - v_f$  is the Stokes shift,  $h$  is Planck's constant,  $c$  is the velocity of light,  $a$  is the Onsager radius of fluorophore,  $\Delta\mu = \mu_e - \mu_g$  is the difference in the dipole moment of fluorophore between the excited ( $\mu_e$ ) and the ground ( $\mu_g$ ) states,  $\epsilon$  and  $n$  are the static dielectric constant and the refractive index of the solvent, respectively,  $\Delta f$  is the orientation polarizability,  $M$  is the molecular weight,  $d$  is the density of molecule, and  $N_a$  is Avogadro's number. Therefore, based on equation, the change in dipole moment,  $\Delta\mu = \mu_e - \mu_g$ , can simply be estimated from the slope of a plot of  $v_a - v_f$  against  $\Delta f$ .



**Table S1.** Detailed absorption and emission peak positions of FCO-TPA, FCO-CzS and FCO-CzO in different solvents.

| Solvents              | $\epsilon$ | n     | $f(\epsilon, n)$ | FCO-TPA             |                     |                                        | FCO-CzS             |                     |                                        | FCO-CzO             |                     |                                        |
|-----------------------|------------|-------|------------------|---------------------|---------------------|----------------------------------------|---------------------|---------------------|----------------------------------------|---------------------|---------------------|----------------------------------------|
|                       |            |       |                  | $\lambda_a$<br>(nm) | $\lambda_f$<br>(nm) | $\nu_a - \nu_f$<br>(cm <sup>-1</sup> ) | $\lambda_a$<br>(nm) | $\lambda_f$<br>(nm) | $\nu_a - \nu_f$<br>(cm <sup>-1</sup> ) | $\lambda_a$<br>(nm) | $\lambda_f$<br>(nm) | $\nu_a - \nu_f$<br>(cm <sup>-1</sup> ) |
| Hexane                | 1.9        | 1.375 | 0.0012           | 357                 | 410                 | 3621                                   | 389                 | 473                 | 4565                                   | 390                 | 434                 | 2600                                   |
| Triethylamine         | 2.42       | 1.401 | 0.048            | 360                 | 432                 | 4630                                   | 392                 | 499                 | 5470                                   | 394                 | 456                 | 3451                                   |
| Ether                 | 4.34       | 1.352 | 0.167            | 359                 | 452                 | 5731                                   | 393                 | 505                 | 5643                                   | 394                 | 472                 | 4194                                   |
| Ethyl acetate         | 6.02       | 1.372 | 0.200            | 362                 | 485                 | 7006                                   | 397                 | 527                 | 6214                                   | 397                 | 500                 | 5189                                   |
| Tetrahydrofuran       | 7.58       | 1.407 | 0.210            | 364                 | 480                 | 6639                                   | 397                 | 526                 | 6178                                   | 398                 | 504                 | 5166                                   |
| Methylene dichloride  | 8.93       | 1.424 | 0.217            | 369                 | 508                 | 7415                                   | 402                 | 557                 | 6922                                   | 406                 | 526                 | 5619                                   |
| N,N-dimethylformamide | 37         | 1.427 | 0.276            | 365                 | 526                 | 8386                                   | 400                 | 562                 | 7206                                   | 403                 | 540                 | 6295                                   |

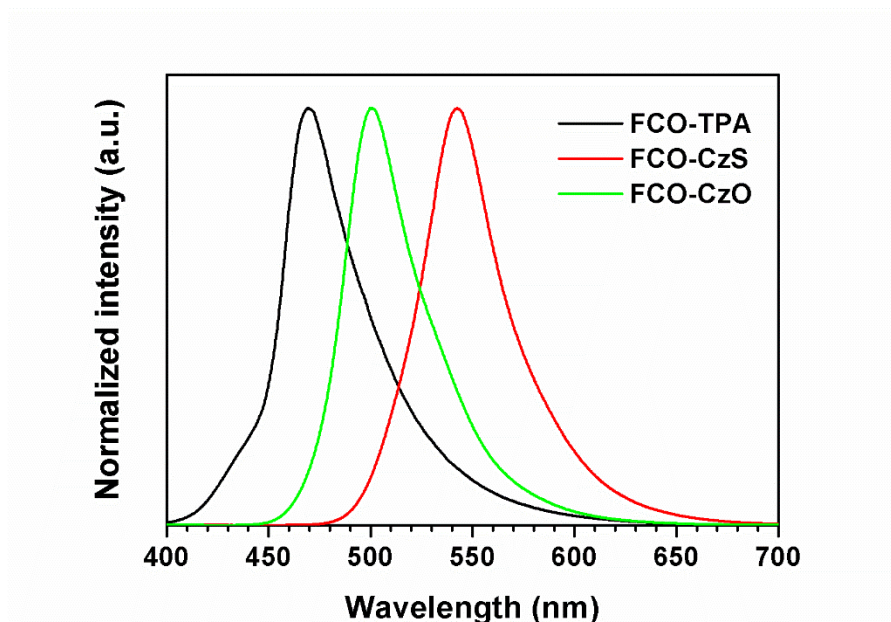

**Figure S14.** The emission spectra of FCO-TPA, FCO-CzS and FCO-CzO in solid state.

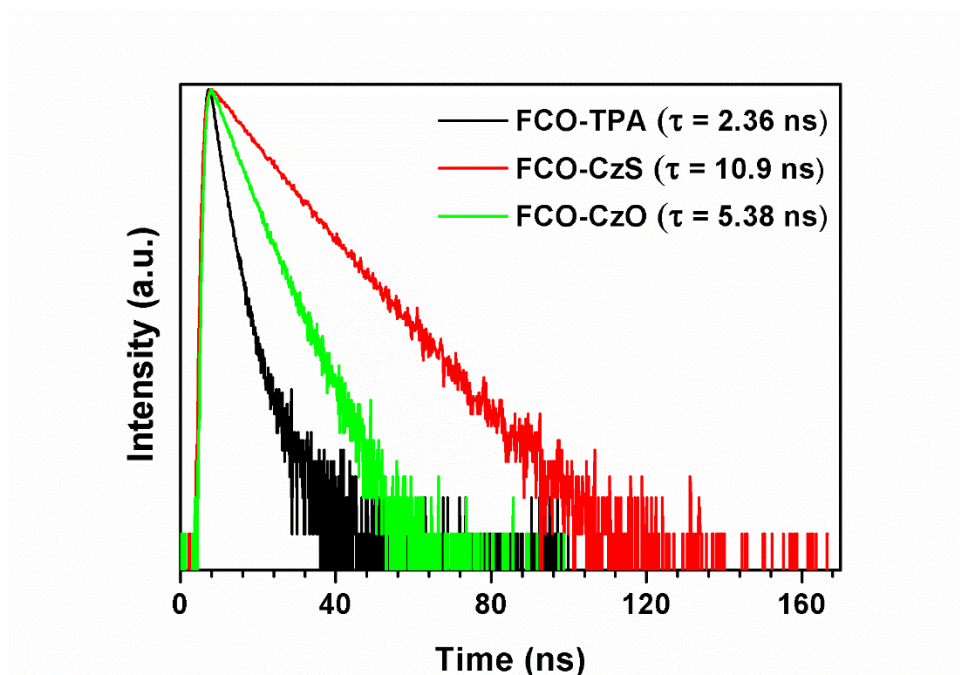

**Figure S15.** Emission decay curves of FCO-TPA, FCO-CzS and FCO-CzO in solid state.

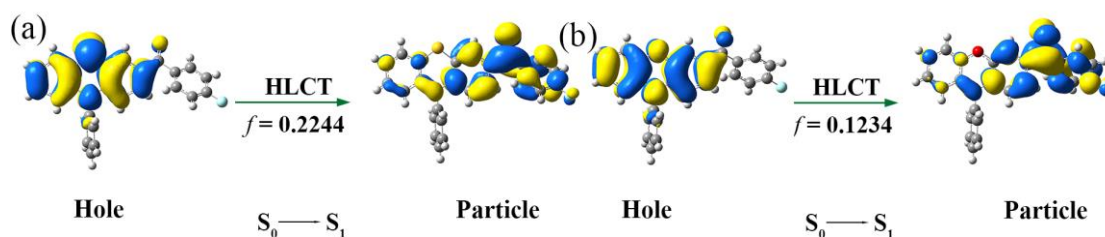

**Figure S16.**  $S_0 \rightarrow S_1$  natural transition orbital (NTO) for FCO-CzS (a) and FCO-CzO (b).

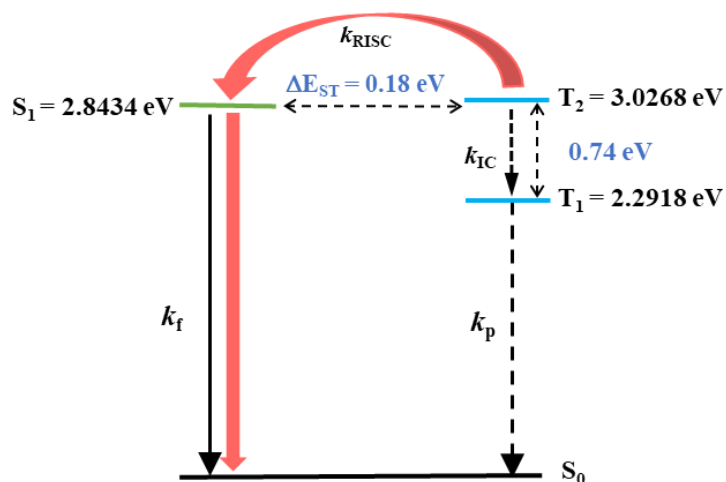

**Figure S17.** The simple model for exciton relaxation process and calculated singlet–triplet energy of FCO-CzS.

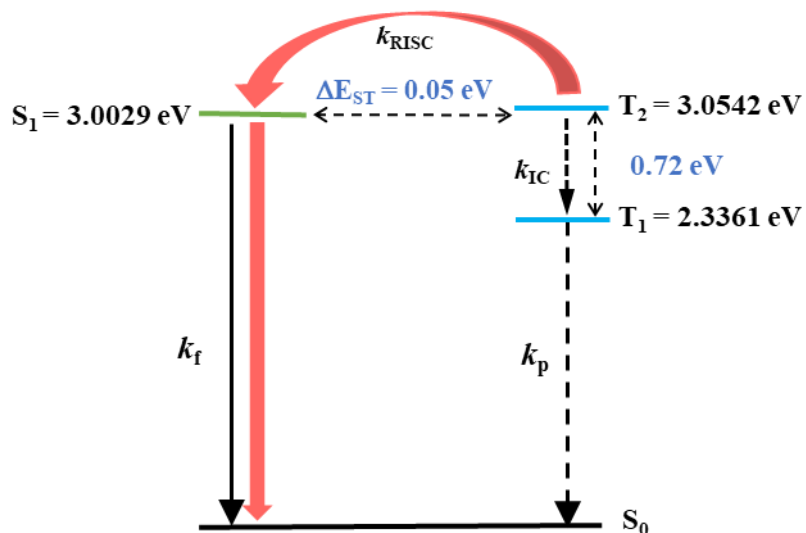

**Figure S18.** The simple model for exciton relaxation process and calculated singlet–triplet energy of FCO-CzO.

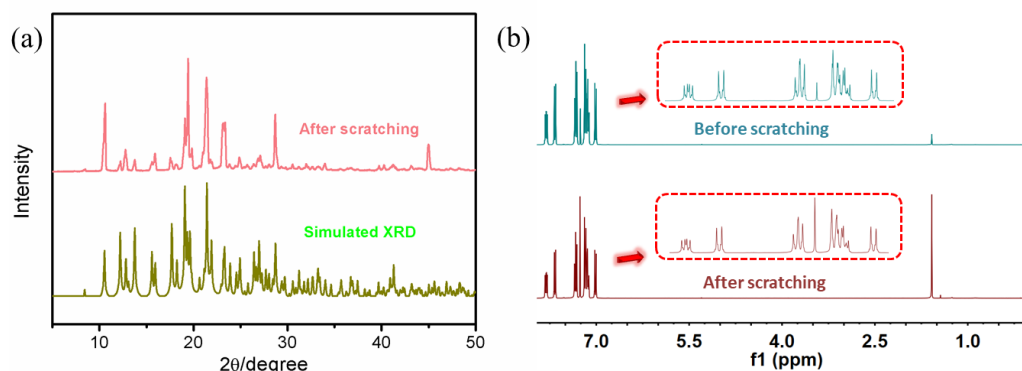

**Figure S19.** The (a) PXRD and (b)  $^1\text{H}$  NMR of FCO-TPA before and after scratching.

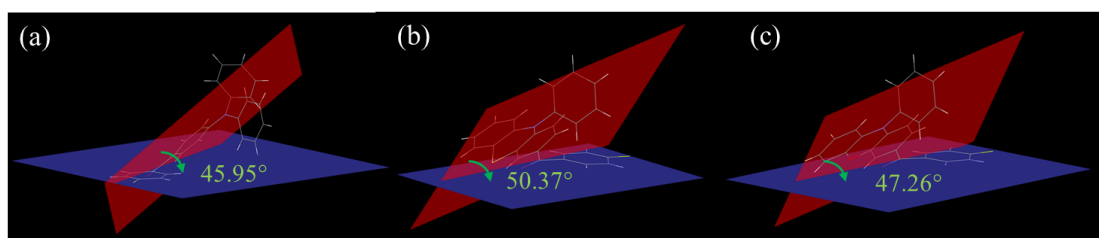

**Figure S20.** The D-A twist angles of (a) FCO-TPA ( $45.95^\circ$ ), (b) FCO-CzS ( $50.37^\circ$ ) and (c) FCO-CzO ( $47.26^\circ$ ).

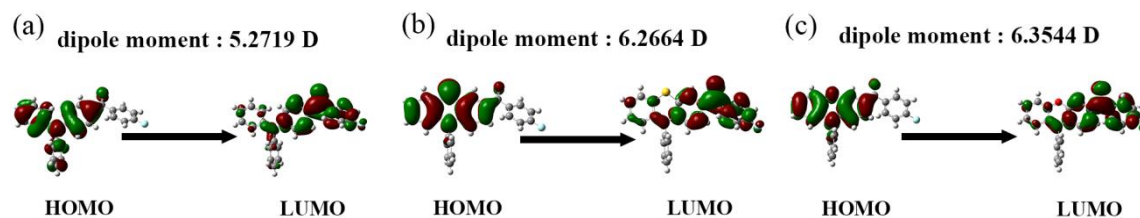

**Figure S21.** The HOMO/LUMO orbital distributions and dipole moments of the isolated molecules for FCO-TPA (a) FCO-CzS (b) and FCO-CzO (c).

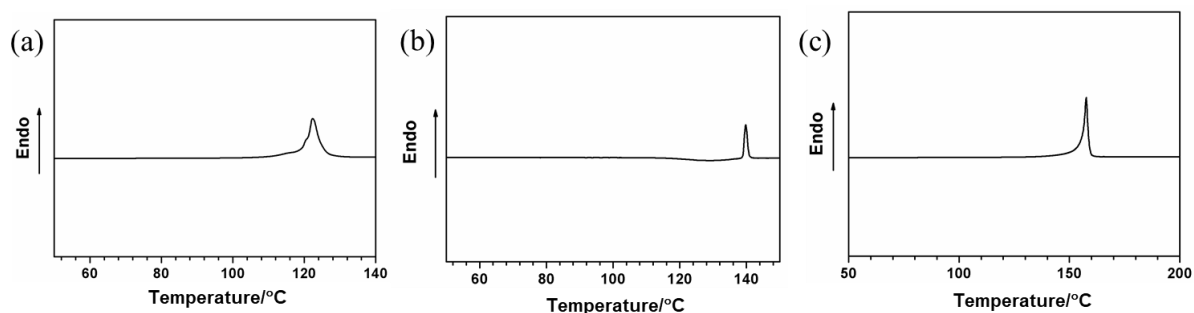

**Figure S22.** The DSC data of (a) FCO-TPA, (b) FCO-CzS and (c) FCO-CzO.

**Table S2** Crystal data and structure refinement for FCO-TPA.

| <b>1</b>                                                             |                                     |
|----------------------------------------------------------------------|-------------------------------------|
| Empirical formula                                                    | C <sub>25</sub> H <sub>18</sub> FNO |
| Formula weight                                                       | 367.40                              |
| Temperature (K)                                                      | 296                                 |
| Crystal system                                                       | orthorhombic                        |
| space group                                                          | Pna21                               |
| a /Å                                                                 | 20.990(4)                           |
| b /Å                                                                 | 9.1680(16)                          |
| c /Å                                                                 | 10.0159(18)                         |
| α /°                                                                 | 90                                  |
| β /°                                                                 | 90                                  |
| γ /°                                                                 | 90                                  |
| V/Å <sup>3</sup>                                                     | 1927.4(6)                           |
| Z                                                                    | 4                                   |
| ρ <sub>calc</sub> (g/cm <sup>3</sup> )                               | 1.266                               |
| μ/mm <sup>-1</sup>                                                   | 0.083                               |
| R <sub>int</sub>                                                     | 0.0351                              |
| Goodness-of-fit on F <sup>2</sup>                                    | 1.044                               |
| R <sub>1</sub> <sup>a</sup> , wR <sub>2</sub> <sup>b</sup> [I>2σ(I)] | 0.0422,0.1029                       |
| R <sub>1</sub> , wR <sub>2</sub> (all data)                          | 0.0653,0.1149                       |

$$^a R_1 = \Sigma ||Fo| - |Fc|| / \Sigma |Fo|. \quad ^b wR^2 = \{ \Sigma [w(Fo^2 - Fc^2)^2] / \Sigma [w(Fo^2)^2] \}^{1/2}$$

**Table S3** Crystal data and structure refinement for FCO-CzS.

| <b>1</b>                                                             |                                                       |
|----------------------------------------------------------------------|-------------------------------------------------------|
| Empirical formula                                                    | C <sub>26</sub> H <sub>16</sub> F Cl <sub>2</sub> NOs |
| Formula weight                                                       | 397.08                                                |
| Temperature (K)                                                      | 298                                                   |
| Crystal system                                                       | triclinic                                             |
| space group                                                          | P-1                                                   |
| a /Å                                                                 | 9.1731(2)                                             |
| b /Å                                                                 | 11.0168(3)                                            |
| c /Å                                                                 | 111.6865(4)                                           |
| α /°                                                                 | 115.261(3)                                            |
| β /°                                                                 | 101.427(2)                                            |
| γ /°                                                                 | 92.737(2)                                             |
| V/Å <sup>3</sup>                                                     | 1035.18(5)                                            |
| Z                                                                    | 2                                                     |
| ρ <sub>calc</sub> (g/cm <sup>3</sup> )                               | 1.541                                                 |
| μ/mm <sup>-1</sup>                                                   | 4.013                                                 |
| R <sub>int</sub>                                                     | 0.0574                                                |
| Goodness-of-fit on F <sup>2</sup>                                    | 1.630                                                 |
| R <sub>1</sub> <sup>a</sup> , wR <sub>2</sub> <sup>b</sup> [I>2σ(I)] | 0.1029, 0.3289                                        |
| R <sub>1</sub> , wR <sub>2</sub> (all data)                          | 0.1085, 0.3450                                        |

$$^a R_1 = \Sigma ||Fo| - |Fc|| / \Sigma |Fo|. \quad ^b wR^2 = \{ \Sigma [w(Fo^2 - Fc^2)^2] / \Sigma [w(Fo^2)^2] \}^{1/2}$$

**Table S4** Crystal data and structure refinement for FCO-CzO.

| <b>1</b>                                                             |                                                  |
|----------------------------------------------------------------------|--------------------------------------------------|
| Empirical formula                                                    | C <sub>25</sub> H <sub>16</sub> FNO <sub>2</sub> |
| Formula weight                                                       | 381.39                                           |
| Temperature (K)                                                      | 298                                              |
| Crystal system                                                       | triclinic                                        |
| space group                                                          | P-1                                              |
| a /Å                                                                 | 8.85361(17)                                      |
| b /Å                                                                 | 9.38414(18)                                      |
| c /Å                                                                 | 11.7086(2)                                       |
| α /°                                                                 | 99.9418(16)                                      |
| β /°                                                                 | 98.5741(16)                                      |
| γ /°                                                                 | 94.0033(16)                                      |
| V/Å <sup>3</sup>                                                     | 942.91(3)                                        |
| Z                                                                    | 2                                                |
| ρ <sub>calc</sub> (g/cm <sup>3</sup> )                               | 1.343                                            |
| μ/mm <sup>-1</sup>                                                   | 0.750                                            |
| R <sub>int</sub>                                                     | 0.0256                                           |
| Goodness-of-fit on F <sup>2</sup>                                    | 1.057                                            |
| R <sub>1</sub> <sup>a</sup> , wR <sub>2</sub> <sup>b</sup> [I>2σ(I)] | 0.0472,0.1174                                    |
| R <sub>1</sub> , wR <sub>2</sub> (all data)                          | 0.0501,0.1214                                    |

$$^a R_1 = \Sigma ||Fo| - |Fc|| / \Sigma |Fo|. \quad ^b wR^2 = \{ \Sigma [w(Fo^2 - Fc^2)^2] / \Sigma [w(Fo^2)^2] \}^{1/2}$$
